# Supplementary material for: Comparative Thermoelectric Properties of Polypropylene Composites Melt-Processed Using Pyrograf® III Carbon Nanofibers
Source: MDPI journal article supplement (doi:10.3390/jcs7040173), 2023-04-20
Supplement: s1 [file s1]

## Supporting Information

# Comparative Thermoelectric Properties of Polypropylene Composites Melt-Processed Using Pyrograf<sup>®</sup> III Carbon Nanofibers

Antonio J. Paleo <sup>1,\*</sup>, Beate Krause <sup>2</sup>, Ana R. Mendes <sup>3</sup>, Carlos J. Tavares <sup>4</sup>, Maria F. Cerqueira <sup>5,6</sup>, Enrique Muñoz <sup>7</sup> and Petra Pötschke <sup>2</sup>

<sup>1</sup> 2C2T-Centre for Textile Science and Technology, University of Minho, Campus de Azurém, 4800-058 Guimarães, Portugal

<sup>2</sup> Leibniz-Institut für Polymerforschung Dresden e.V. (IPF), Hohe Str. 6, 01069 Dresden, Germany; krause-beate@ipfdd.de (B.K.); poe@ipfdd.de (P.P.)

<sup>3</sup> SEMAT/UM-Materials Characterization Services, University of Minho, 4804-533 Guimarães, Portugal; a85605@alunos.uminho.pt

<sup>4</sup> Physics Centre of Minho and Porto Universities (CF-UM-PT), University of Minho, 4804-533 Guimarães, Portugal; ctavares@fisica.uminho.pt

<sup>5</sup> INL—International Iberian Nanotechnology Laboratory, Av. Mestre, Jose Veiga, 4715-330 Braga, Portugal; fcerqueira@fisica.uminho.pt

<sup>6</sup> CFUM—Center of Physics of the University of Minho, Campus de Gualtar, 4710-057 Braga, Portugal

<sup>7</sup> Facultad de Física, Pontificia Universidad Católica de Chile, Santiago 7820436, Chile; munoztavera@gmail.com

\* Correspondence: ajpaleovieito@2c2t.uminho.pt

### 2.1 Materials and their Processing

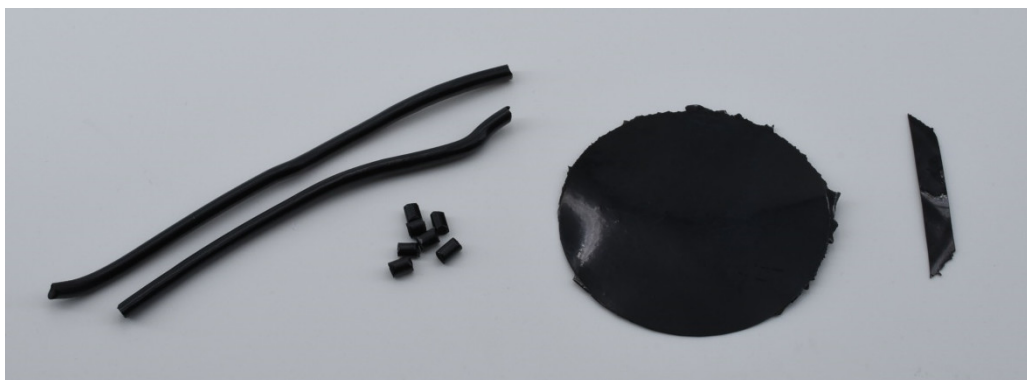

**Figure S1.** Photos showing the steps of manufacturing the samples: from left to right: extruded strands, pelletized material, compression molded plate, strip cut from the plate and used for the preparation of the sample for TE measurements.

## 2.5 Thermoelectric analysis

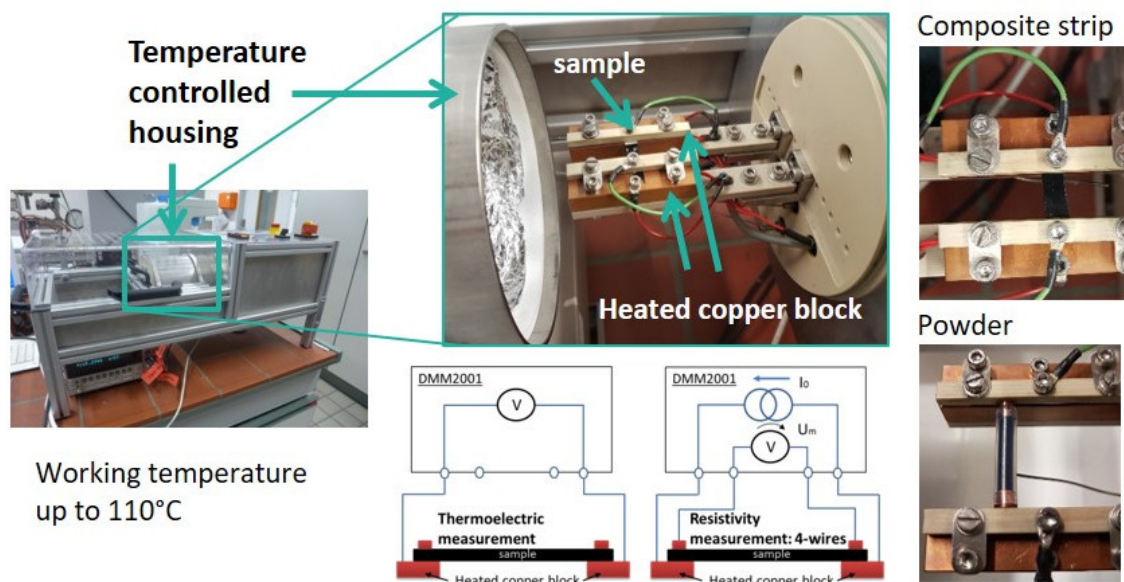

**Figure S2.** Photos and schema of the used thermoelectric measurement equipment used to measure Seebeck coefficient and electrical conductivity simultaneously (replotted from [1]).

## 3.2 XRD and Raman analysis

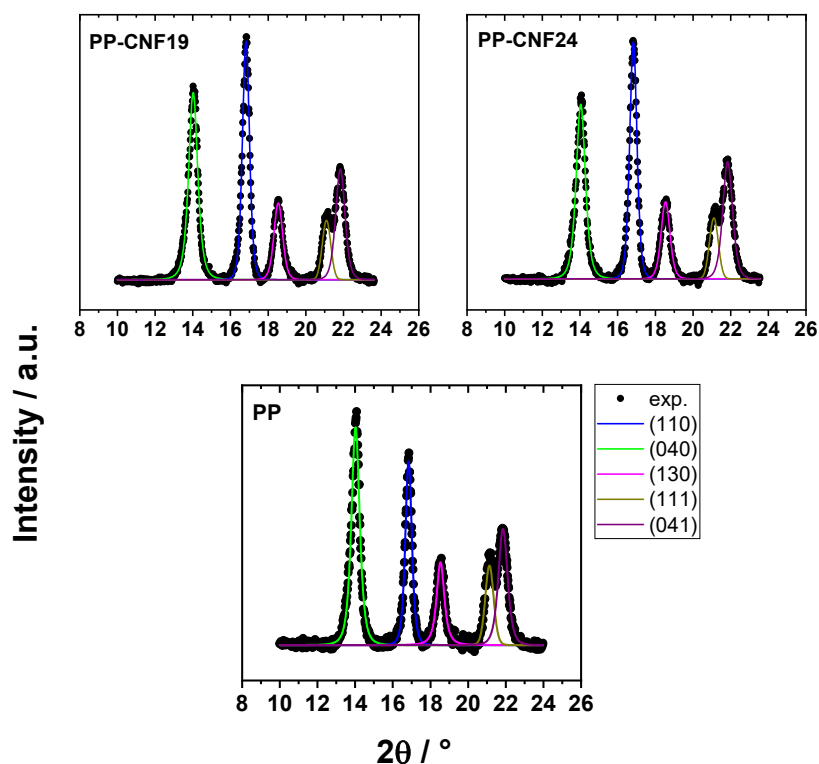

**Figure S3.** Experimental and fitted X-ray diffraction patterns for polypropylene and the matrix of this material in the PP/CNF composites.

**Table S1.** Parameters from the fitted X-ray diffraction peaks (hkl) in Figure S1. For each peak, the respective  $2\theta$  (°) position, FWHM (°) and crystalline domain,  $D$ , (nm) size are presented.

| Sample   | (110)           | (040)           | (130)           | (111)           | (041)           |
|----------|-----------------|-----------------|-----------------|-----------------|-----------------|
|          | $2\theta$ (°) / |
|          | FWHM (°) /      |
|          | $D$ (nm)        |
| PP       | 14.02           | 16.84           | 18.53           | 21.13           | 21.85           |
|          | 0.51            | 0.40            | 0.48            | 0.52            | 0.58            |
|          | 15.7            | 20.1            | 16.8            | 15.6            | 14.0            |
| PP-CNF19 | 14.02           | 16.82           | 18.54           | 21.10           | 21.83           |
|          | 0.56            | 0.44            | 0.54            | 0.53            | 0.58            |
|          | 15.4            | 18.3            | 14.9            | 15.3            | 14.0            |
| PP-CNF24 | 14.04           | 16.83           | 18.54           | 21.11           | 21.84           |
|          | 0.57            | 0.45            | 0.55            | 0.55            | 0.61            |
|          | 14.1            | 17.9            | 14.6            | 14.7            | 13.3            |

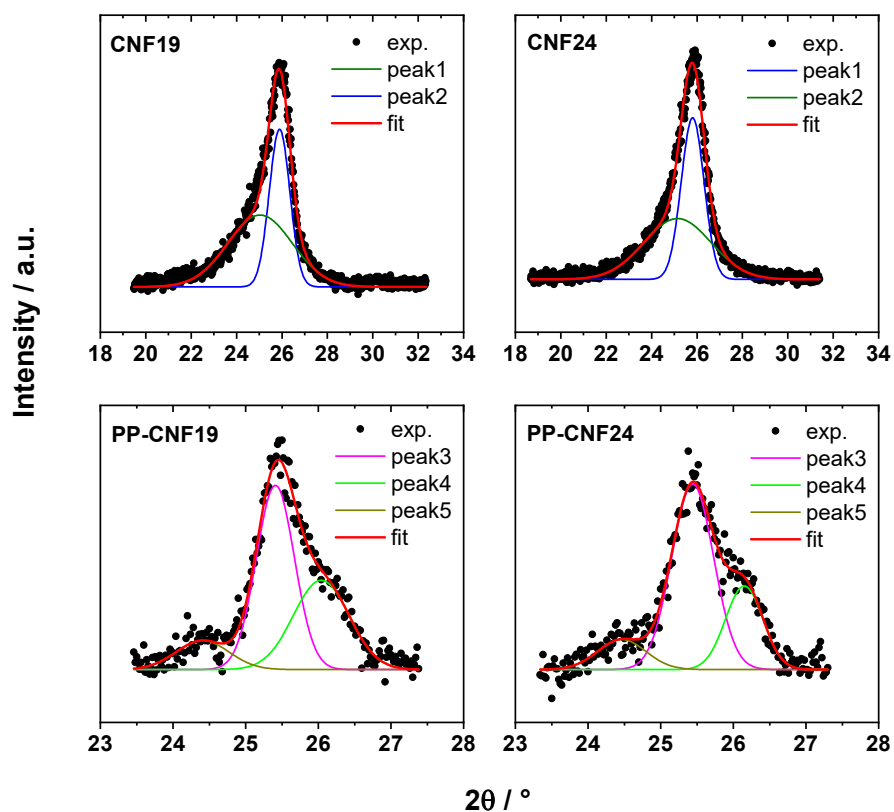

**Figure S4.** Experimental and fitted X-ray diffraction patterns in the region of the main graphitic contribution for the CNF and PP/CNF composites.

**Table S2.** Parameters from the fitted X-ray diffraction peaks in Figure S2. For each peak, the respective  $2\theta$  (°) position, FWHM (°) and crystalline domain,  $D$ , (nm) size are presented.

| Sample   | Peak 1          | Peak 2          | Peak 3          | Peak 4          | Peak 5          |
|----------|-----------------|-----------------|-----------------|-----------------|-----------------|
|          | $2\theta$ (°) / |
|          | FWHM (°) /      |
|          | $D$ (nm)        |
| CNF19    | 25.03           | 25.89           |                 |                 |                 |
|          | 3.36            | 1.07            | -               | -               | -               |
|          | 2.4             | 7.6             |                 |                 |                 |
| CNF24    | 25.14           | 25.81           |                 |                 |                 |
|          | 3.48            | 1.18            | -               | -               | -               |
|          | 2.3             | 6.9             |                 |                 |                 |
| PP-CNF19 |                 |                 | 24.41           | 25.41           | 26.04           |
|          | -               | -               | 0.85            | 0.62            | 0.90            |
|          |                 |                 | 9.6             | 13.1            | 9.1             |
| PP-CNF24 | -               | -               | 24.46           | 25.44           | 26.15           |

|  |      |      |      |
|--|------|------|------|
|  | 0.78 | 0.68 | 0.60 |
|  | 10.4 | 12.0 | 13.6 |

### 3.5 Thermoelectric analysis of PP/CNF composites from 40 °C to 100 °C

**Table S3.** Electrical volume conductivity and Seebeck coefficient of CNFs and PP/CNF composites from 40 °C to 100 °C. (Data for CNF19 and PP/CNF19 taken with permission from ref. [2]. Data of CNF 24 taken with permission from ref. [3]).

| T (°C) | Sample   | Conductivity (S/m) | Seebeck (μV/K) | Power Factor (μW/mK <sup>2</sup> ) | zT                     |
|--------|----------|--------------------|----------------|------------------------------------|------------------------|
| 40     | CNF19    | 131.5 ± 20         | -5.4 ± 0.2     | 3.8 × 10 <sup>-3</sup>             | -                      |
|        | CNF24    | 131.6 ± 0.1        | -5.4 ± 0.1     | 3.8 × 10 <sup>-3</sup>             | -                      |
| 60     | CNF19    | 131.5 ± 19         | -5.6 ± 0.1     | 4.1 × 10 <sup>-3</sup>             | -                      |
|        | CNF24    | 129.2 ± 10         | -5.4 ± 0.1     | 3.8 × 10 <sup>-3</sup>             | -                      |
| 80     | CNF19    | 131.2 ± 17         | -5.6 ± 0.1     | 4.1 × 10 <sup>-3</sup>             | -                      |
|        | CNF24    | 124.4 ± 13         | -5.8 ± 0.1     | 4.2 × 10 <sup>-3</sup>             | -                      |
| 100    | CNF19    | 127.0 ± 14         | -5.8 ± 0.1     | 4.3 × 10 <sup>-3</sup>             | -                      |
|        | CNF24    | 123.9 ± 14         | -5.9 ± 0.1     | 4.3 × 10 <sup>-3</sup>             | -                      |
| 40     | PP/CNF19 | 16.5 ± 0.7         | -3.8 ± 0.1     | 2.4 × 10 <sup>-4</sup>             | 3.0 × 10 <sup>-7</sup> |
|        | PP/CNF24 | 62.7 ± 7           | -4.4 ± 0.1     | 1.2 × 10 <sup>-3</sup>             | 1.3 × 10 <sup>-6</sup> |
| 60     | PP/CNF19 | 16.1 ± 0.7         | -4.0 ± 0.1     | 2.6 × 10 <sup>-4</sup>             | 3.6 × 10 <sup>-7</sup> |
|        | PP/CNF24 | 56.0 ± 2           | -5.1 ± 0.2     | 1.5 × 10 <sup>-3</sup>             | 1.6 × 10 <sup>-6</sup> |
| 80     | PP/CNF19 | 15.3 ± 0.6         | -4.2 ± 0.1     | 2.7 × 10 <sup>-4</sup>             | 4.0 × 10 <sup>-7</sup> |
|        | PP/CNF24 | 56.8 ± 2           | -5.5 ± 0.1     | 1.7 × 10 <sup>-3</sup>             | 2.0 × 10 <sup>-6</sup> |
| 100    | PP/CNF19 | 13.9 ± 0.4         | -4.3 ± 0.1     | 2.6 × 10 <sup>-4</sup>             | 4.4 × 10 <sup>-7</sup> |
|        | PP/CNF24 | 53.2 ± 0.1         | -6.1 ± 0.1     | 2.0 × 10 <sup>-3</sup>             | 2.5 × 10 <sup>-6</sup> |

### References:

1. Krause, B.; Pötschke, P. Polyethylene Glycol as Additive to Achieve N-Conductive Melt-Mixed Polymer/Carbon Nanotube Composites for Thermoelectric Application. *Nanomaterials* **2022**, *12*, 3812.
2. Paleo, A.J.; Krause, B.; Cerqueira, M.F.; Muñoz, E.; Pötschke, P.; Rocha, A.M. Nonlinear Thermopower Behaviour of N-Type Carbon Nanofibres and Their Melt Mixed Polypropylene Composites. *Polymers* **2022**, *14*, 269.
3. Paleo, A.J.; Krause, B.; Cerqueira, M.F.; Muñoz, E.; Pötschke, P.; Rocha, A.M. Electronic Features of Cotton Fabric e-Textiles Prepared with Aqueous Carbon Nanofiber Inks. *ACS Applied Engineering Materials* **2023**, *1*, 122-131, doi:10.1021/acsaenm.2c00023.
